# Supplementary material for: KDAC8 with High Basal Velocity Is Not Activated by N-Acetylthioureas
Source: PubMed Central journal article supplement (PMC4706426; doi:10.1371/journal.pone.0146900), 2016-01-08
Supplement: pone.0146900.s002.pdf [file pone.0146900.s002.pdf]

**S1 Table.** Comparison of expected and measured <sup>1</sup>H-NMR spectrum for TM-2-51.

| Proton(s) | Expected $\delta$ (ppm) <sup>a</sup><br>Acetone-D <sub>6</sub> , 400 MHz | Measured $\delta$ (ppm)<br>Acetone-D <sub>6</sub> , 300 MHz |
|-----------|--------------------------------------------------------------------------|-------------------------------------------------------------|
| N         | - <sup>b</sup>                                                           | - <sup>b</sup>                                              |
| N'        | 10.3 (bs, 1H)                                                            | - <sup>b</sup>                                              |
| C3, C7    | 8.06 - 8.04 (m, 2H)                                                      | 8.11 - 8.08 (m, 2H)                                         |
| C2', C6'  | 7.78 - 7.76 (m, 2H)                                                      | 7.84 - 7.81 (m, 2H)                                         |
| C5        | 7.69 - 7.64 (m, 1H)                                                      | 7.72 - 7.69 (m, 1H)                                         |
| C4, C6    | 7.57 - 7.53 (m, 2H)                                                      | 7.63 - 7.60 (m, 2H)                                         |
| C3', C5'  | 7.43 - 7.38 (m, 2H)                                                      | 7.48 - 7.45 (m, 2H)                                         |
| C4'       | 7.28 - 7.24 (m, 1H)                                                      | 7.32 - 7.27 (m, 1H)                                         |

<sup>a</sup> From reference [17].

<sup>b</sup> Not observed.
