# Supplementary material for: KDAC8 with High Basal Velocity Is Not Activated by N-Acetylthioureas
Source: PubMed Central journal article supplement (PMC4706426; doi:10.1371/journal.pone.0146900), 2016-01-08
Supplement: pone.0146900.s003.pdf [file pone.0146900.s003.pdf]

**S2 Table.** Comparison of expected and measured <sup>1</sup>H-NMR spectrum for TM-2-88.

| Proton(s)  | Expected $\delta$ (ppm) <sup>a</sup> | Measured $\delta$ (ppm)          |
|------------|--------------------------------------|----------------------------------|
|            | Acetone-D <sub>6</sub> , 300 MHz     | Acetone-D <sub>6</sub> , 300 MHz |
| N          | 12.86 (bs, 1H)                       | 12.87 (bs, 1H)                   |
| N'         | 10.27 (bs, 1H)                       | 10.27 (bs, 1H)                   |
| C3, C7     | 8.08 (d, J = 7.8 Hz, 2H)             | 8.10 (d, 2H)                     |
| C4, C5, C6 | 7.73 - 7.56 (m, 3H)                  | 7.74 - 7.59 (m, 3H)              |
| C2', C6'   | 7.11 (d, J = 2.4 Hz, 2H)             | 7.13 (s, 2H)                     |
| C4'        | 6.42 - 6.40 (m, 1H)                  | 6.43 - 6.41 (m, 1H)              |
| Methoxy    | 3.81 (s, 6H)                         | 3.82 (s, 6H)                     |

<sup>a</sup> From reference [17].
