# Supplementary material for: KDAC8 with High Basal Velocity Is Not Activated by N-Acetylthioureas
Source: PubMed Central journal article supplement (PMC4706426; doi:10.1371/journal.pone.0146900), 2016-01-08
Supplement: pone.0146900.s004.pdf [file pone.0146900.s004.pdf]

**S3 Table.** Comparison of expected and measured <sup>1</sup>H-NMR spectrum for TM-2-104.

| Proton(s)        | Expected $\delta$ (ppm) <sup>a</sup><br>CDCl <sub>3</sub> , 400 MHz | Measured $\delta$ (ppm)<br>CDCl <sub>3</sub> , 300 MHz |
|------------------|---------------------------------------------------------------------|--------------------------------------------------------|
| N                | 10.90 (d, J = 6.4 Hz, 1H)                                           | 11.02 (d, 1H)                                          |
| N'               | 8.75 (bs, 1H)                                                       | 9.02 (bs, 1H)                                          |
| C3, C7           | 7.63 - 7.61 (m, 2H)                                                 | 7.70 - 7.67 (m, 2H)                                    |
| C5               | 7.43 - 7.39 (m, 1H)                                                 | 7.48 - 7.43 (m, 1H)                                    |
| C5', C7'         | 7.33 - 7.28 (m, 2H)                                                 | 7.36 - 7.31 (m, 2H)                                    |
| C4, C6, C4', C8' | 7.21 - 7.15 (m, 4H)                                                 | 7.25 - 7.23 (m, 4H)                                    |
| C6'              | 7.11 - 7.07 (m, 1H)                                                 | 7.17 - 7.11 (m, 1H)                                    |
| C2'              | 5.45 - 5.38 (m, 1H)                                                 | 5.54 - 5.44 (m, 1H)                                    |
| C1'              | 1.46 (d, J = 6.8 Hz, 3H)                                            | 1.53 (d, 3H)                                           |

<sup>a</sup> From reference [17].
