# Supplementary material for: KDAC8 with High Basal Velocity Is Not Activated by N-Acetylthioureas
Source: PubMed Central journal article supplement (PMC4706426; doi:10.1371/journal.pone.0146900), 2016-01-08
Supplement: pone.0146900.s005.pdf [file pone.0146900.s005.pdf]

**S4 Table.** Comparison of expected and measured melting point temperatures of the N-acetylthioureas.

| N-acetylthiourea | Melting point (°C)    |                |
|------------------|-----------------------|----------------|
|                  | Expected <sup>a</sup> | Measured       |
| TM-2-51          | 148 - 150             | 144 - 146      |
| TM-2-88          | 154 - 156             | 152 - 155      |
| TM-2-104         | - <sup>b</sup>        | - <sup>b</sup> |

<sup>a</sup> From reference [17].

<sup>b</sup> Not measured, as the melting temperature is below room temperature.
